# Supplementary material
Source: publisher figshare collection journal article supplement (https://acs.figshare.com/ndownloader/files/4324006)
Supplement: Supplementary file 1 [file 4324006]

## Supporting Information

### Syntheses of A Perfluoroethanesulfonyl Fluoride Vinyl Ether

Changqing Lu, Wanchao Jiang, Tom Hickman, and Darryl D. DesMarteau\*

*Department of Chemistry, Clemson University, Clemson, SC 29634, USA*  
*fluorin@clemson.edu*

#### CONTENTS

|                                                                                                  |     |
|--------------------------------------------------------------------------------------------------|-----|
| <b>Figure S1.</b> $^{19}\text{F}$ NMR spectrum of <b>2</b> .                                     | S2  |
| <b>Figure S2.</b> $^{19}\text{F}$ NMR spectrum of <b>3</b> .                                     | S3  |
| <b>Figure S3.</b> IR spectrum of <b>4</b> .                                                      | S4  |
| <b>Figure S4.</b> $^{19}\text{F}$ NMR spectrum of <b>4</b> .                                     | S5  |
| <b>Figure S5.</b> IR spectrum of <b>5</b> .                                                      | S6  |
| <b>Figure S6.</b> $^{19}\text{F}$ NMR spectrum of <b>5</b> .                                     | S7  |
| <b>Figure S7.</b> IR spectrum of <b>6</b> .                                                      | S8  |
| <b>Figure S8.</b> $^{19}\text{F}$ NMR spectrum of <b>6</b> .                                     | S9  |
| <b>Figure S9.</b> IR spectrum of <b>8</b> obtained via first synthetic route.                    | S10 |
| <b>Figure S10.</b> $^{19}\text{F}$ NMR spectrum of <b>8</b> obtained via first synthetic route.  | S11 |
| <b>Figure S11.</b> $^{19}\text{F}$ NMR spectrum of <b>7</b> .                                    | S12 |
| <b>Figure S12.</b> $^{19}\text{F}$ NMR spectrum of <b>8</b> obtained via second synthetic route. | S13 |
| <b>Figure S13.</b> HRMS analysis of hydrolyzed <b>8</b> obtained via second synthetic route.     | S14 |

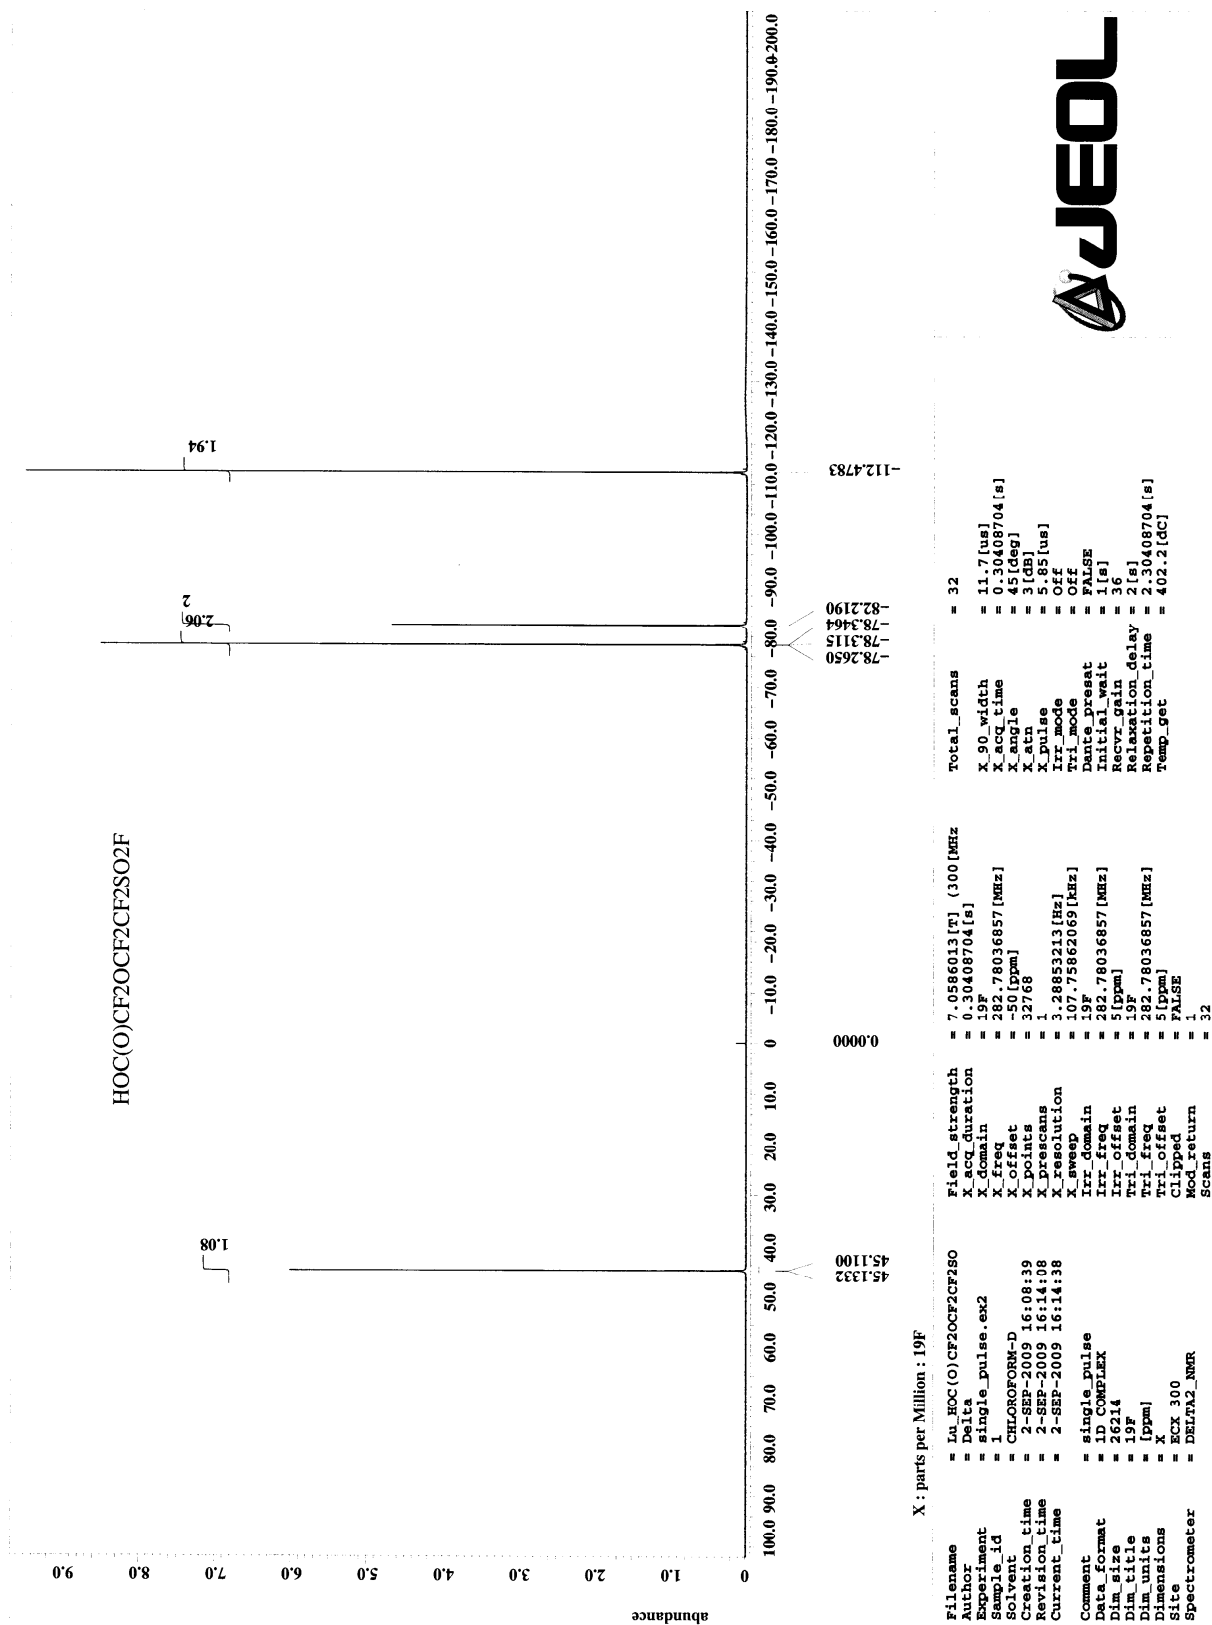

Figure S1. <sup>19</sup>F NMR spectrum of 2.

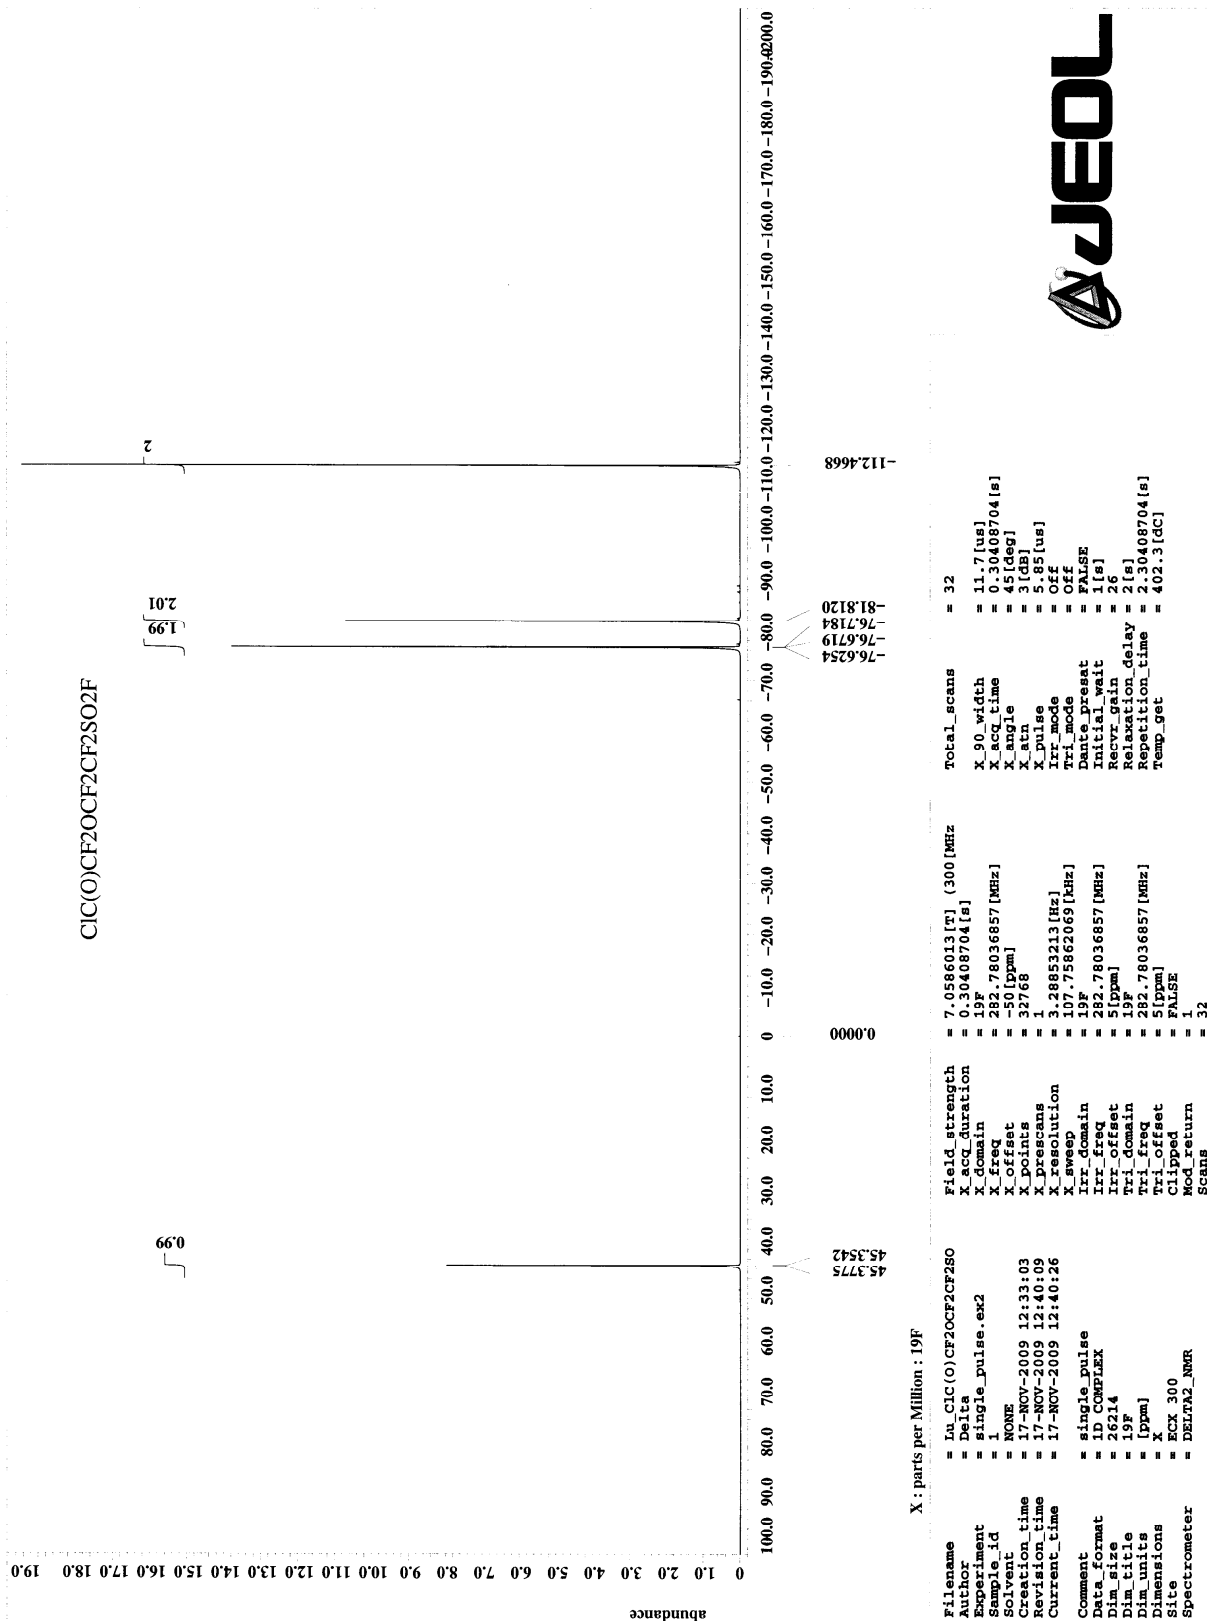

Figure S2. <sup>19</sup>F NMR spectrum of 3.

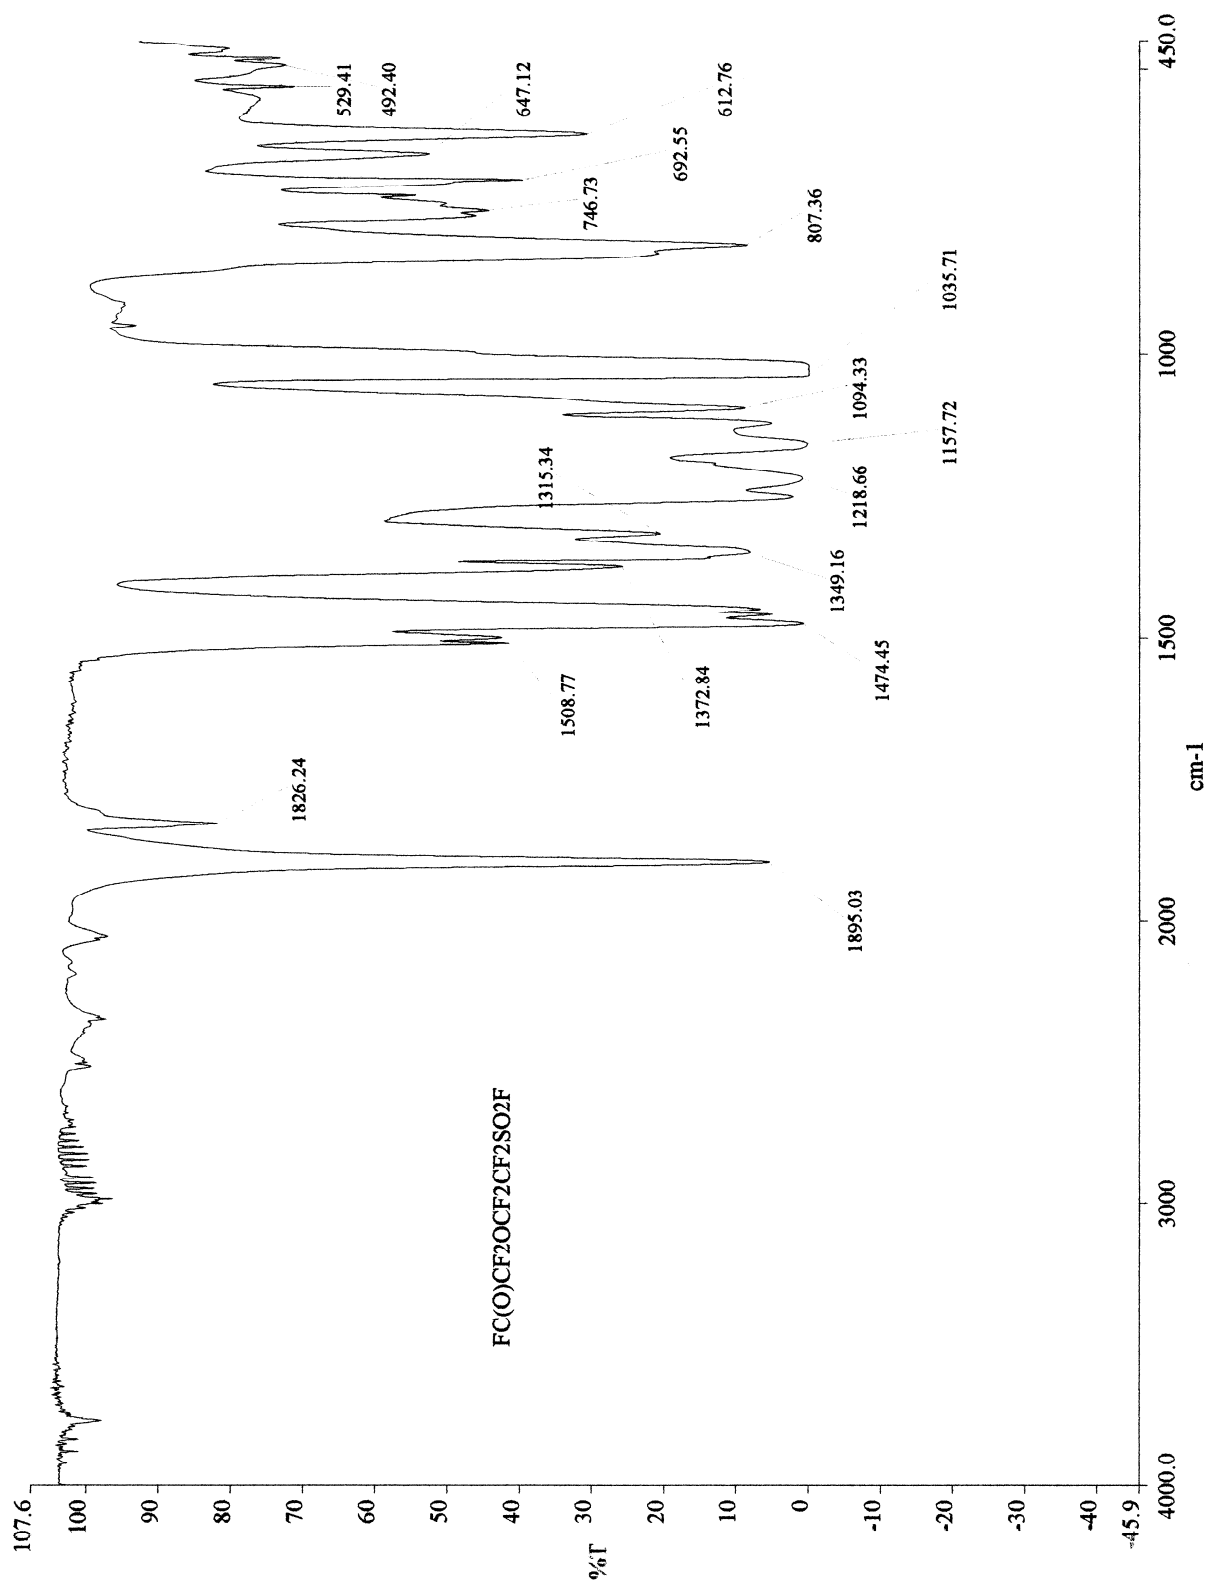

Figure S3. IR spectrum of 4.

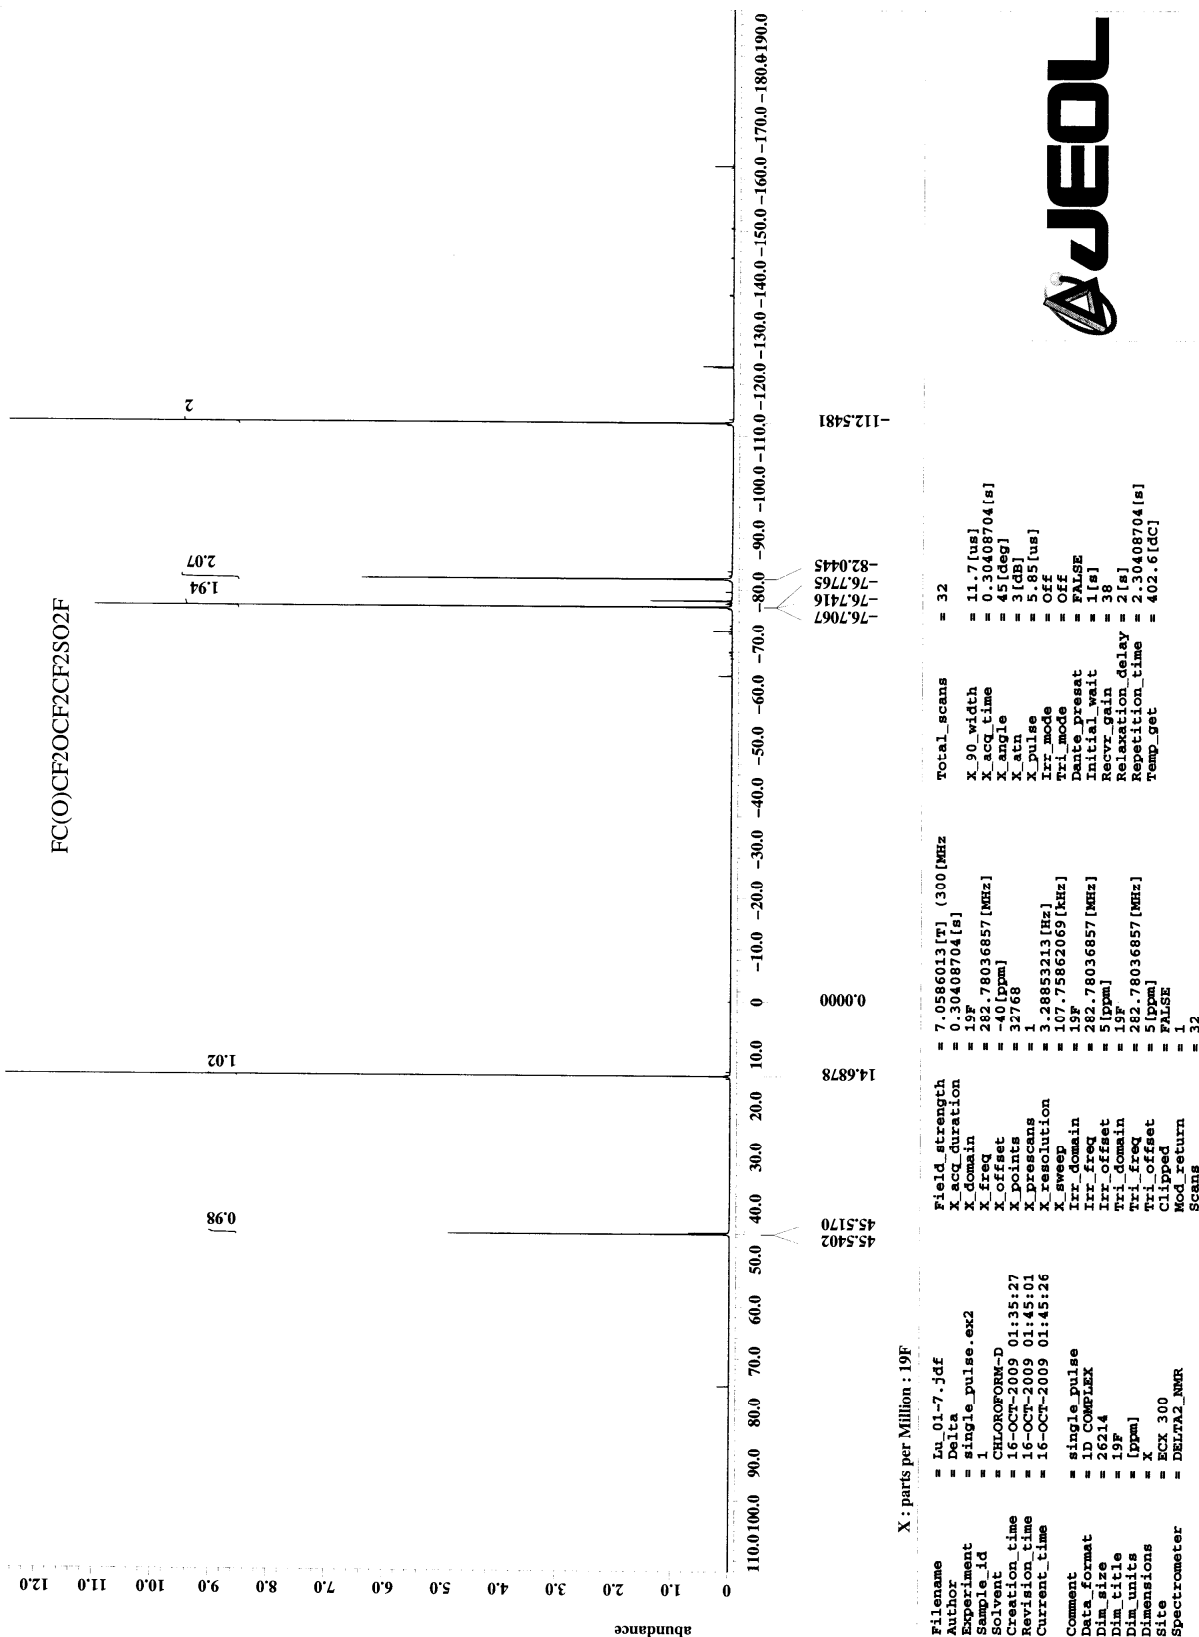

Figure S4. <sup>19</sup>F NMR spectrum of **4**.

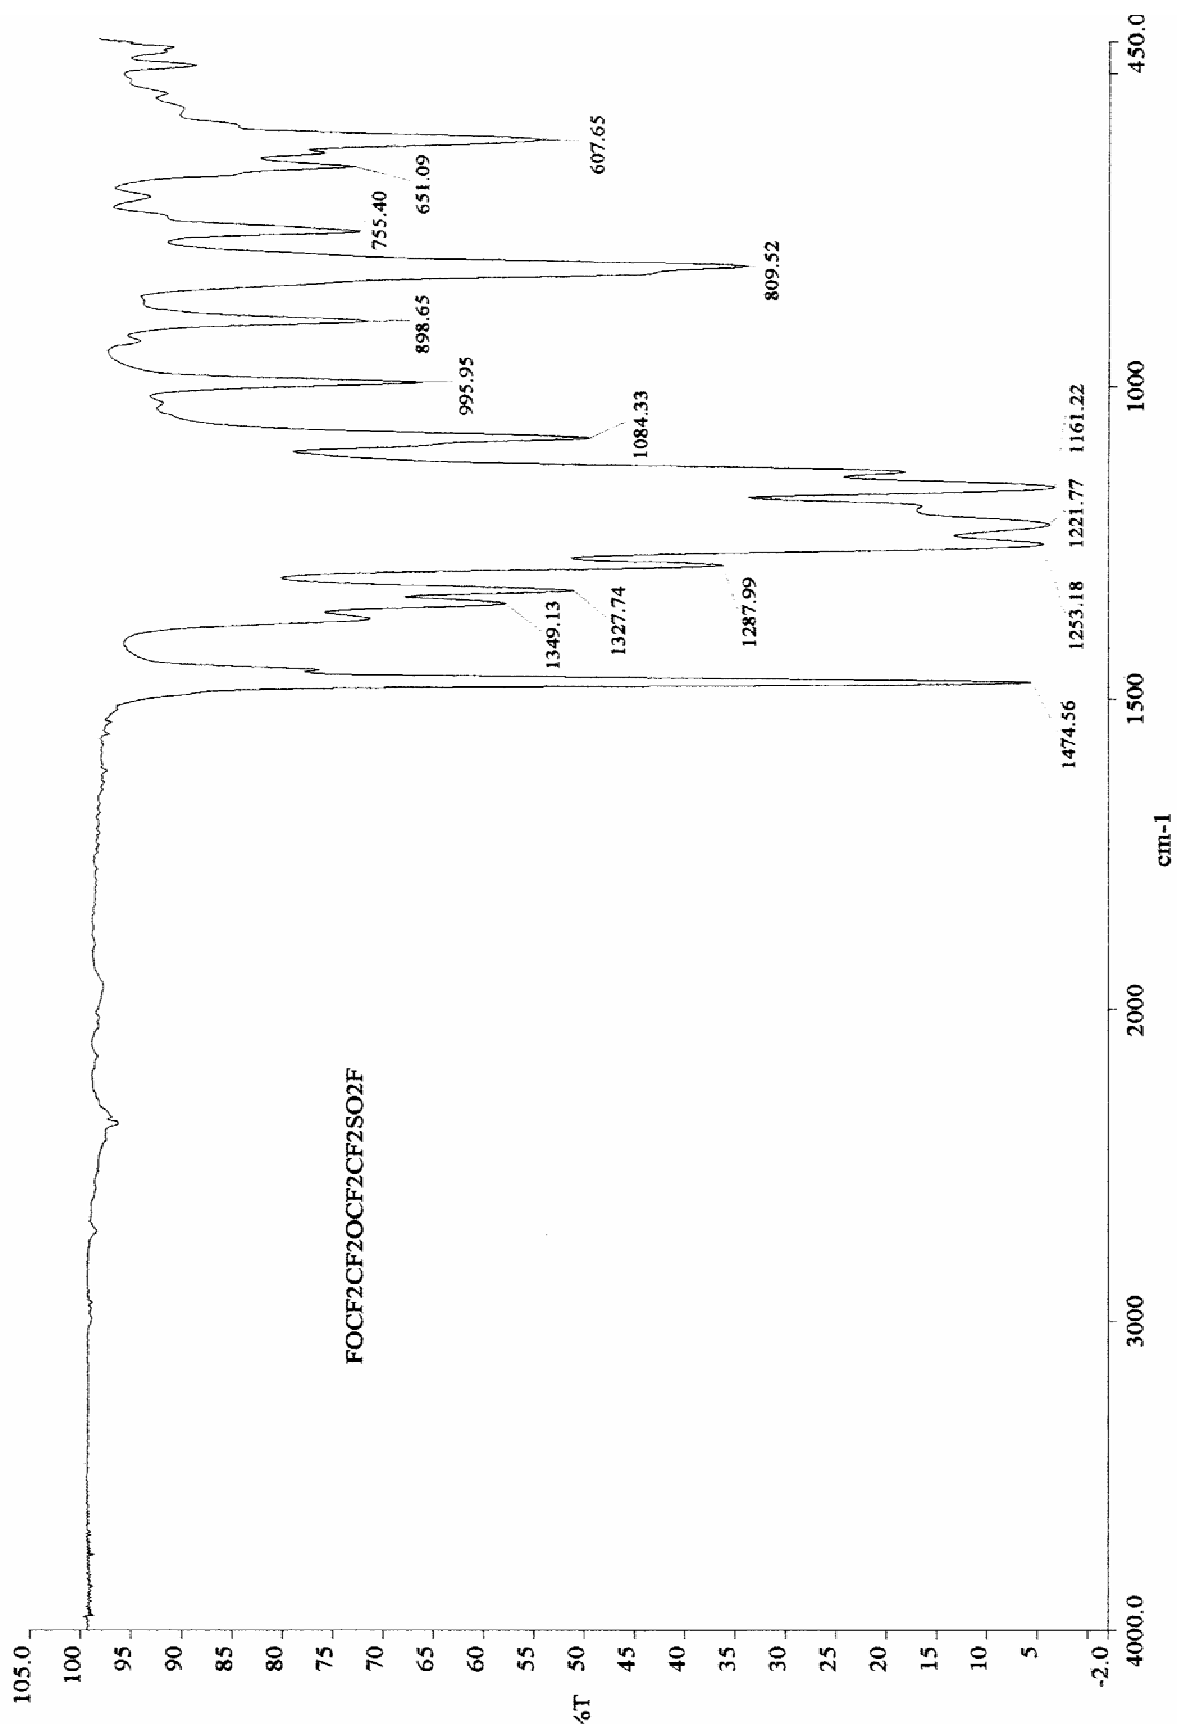

**Figure S5.** IR spectrum of **5**.

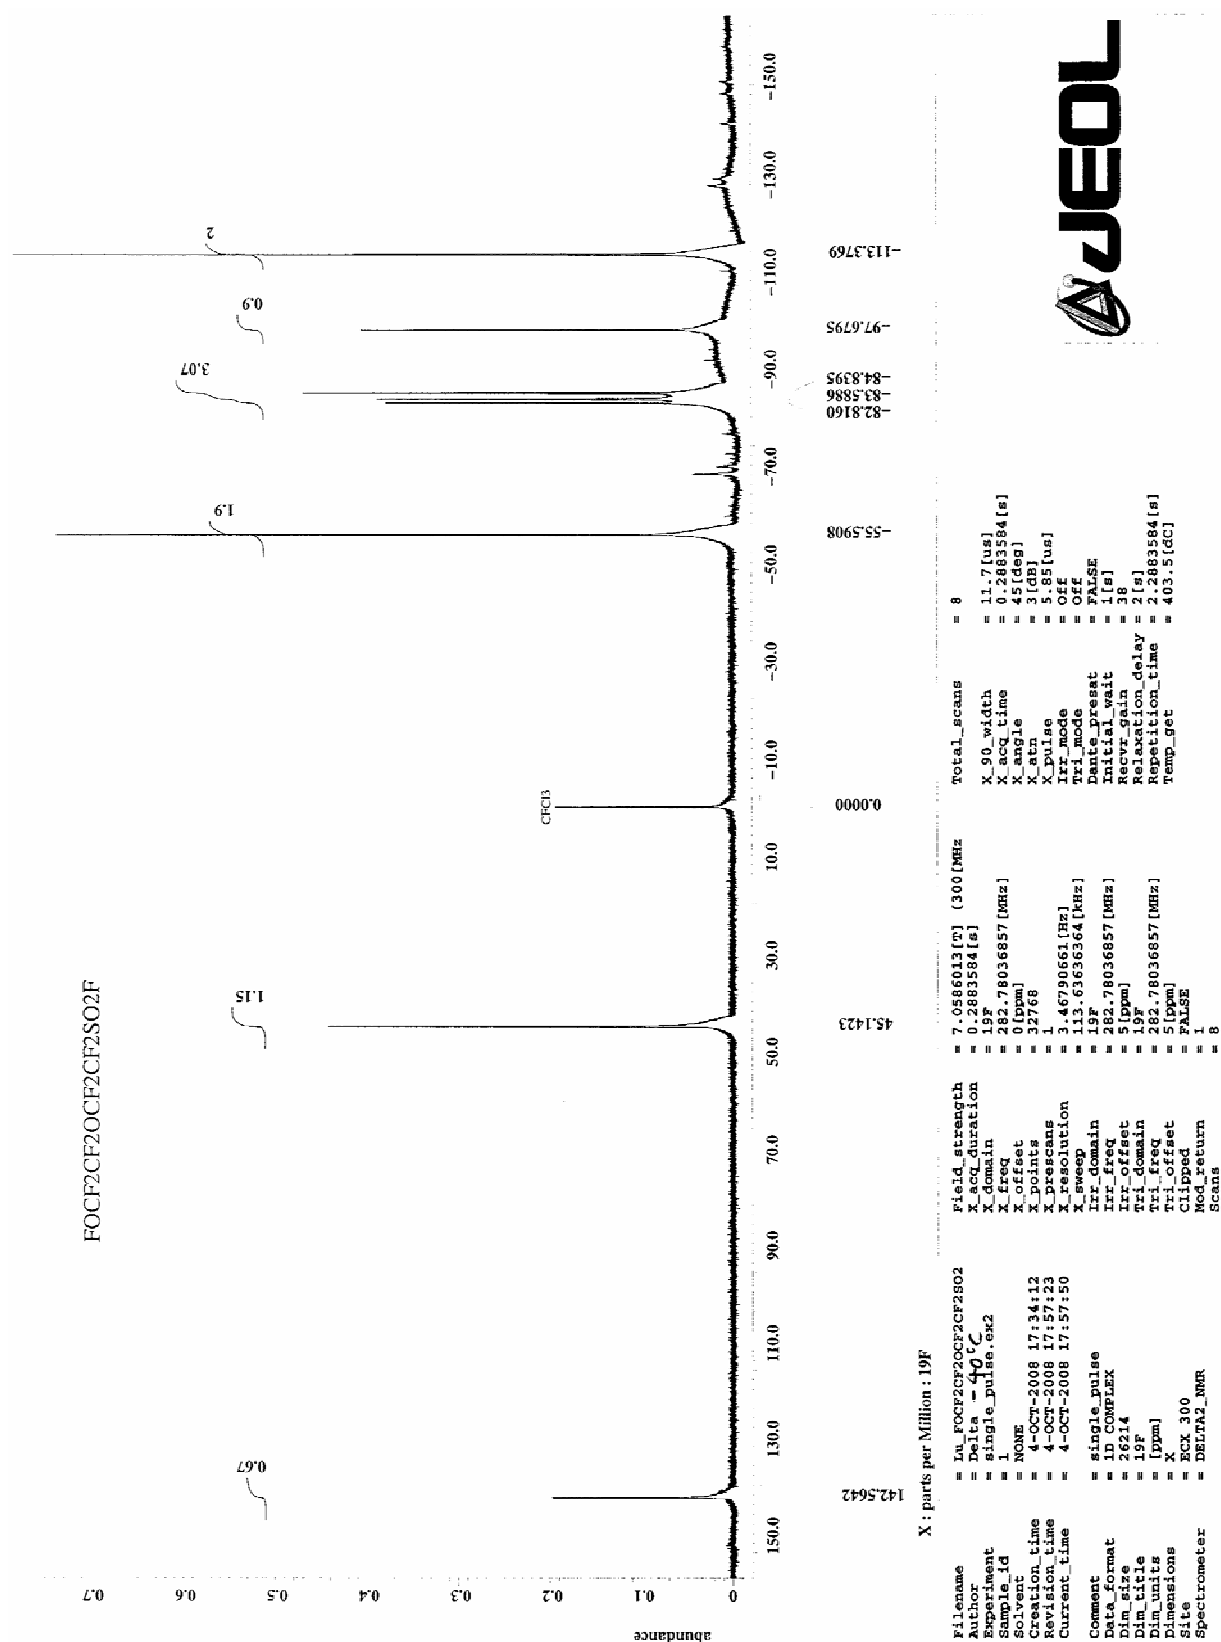

Figure S6.  $^{19}\text{F}$  NMR spectrum of 5.

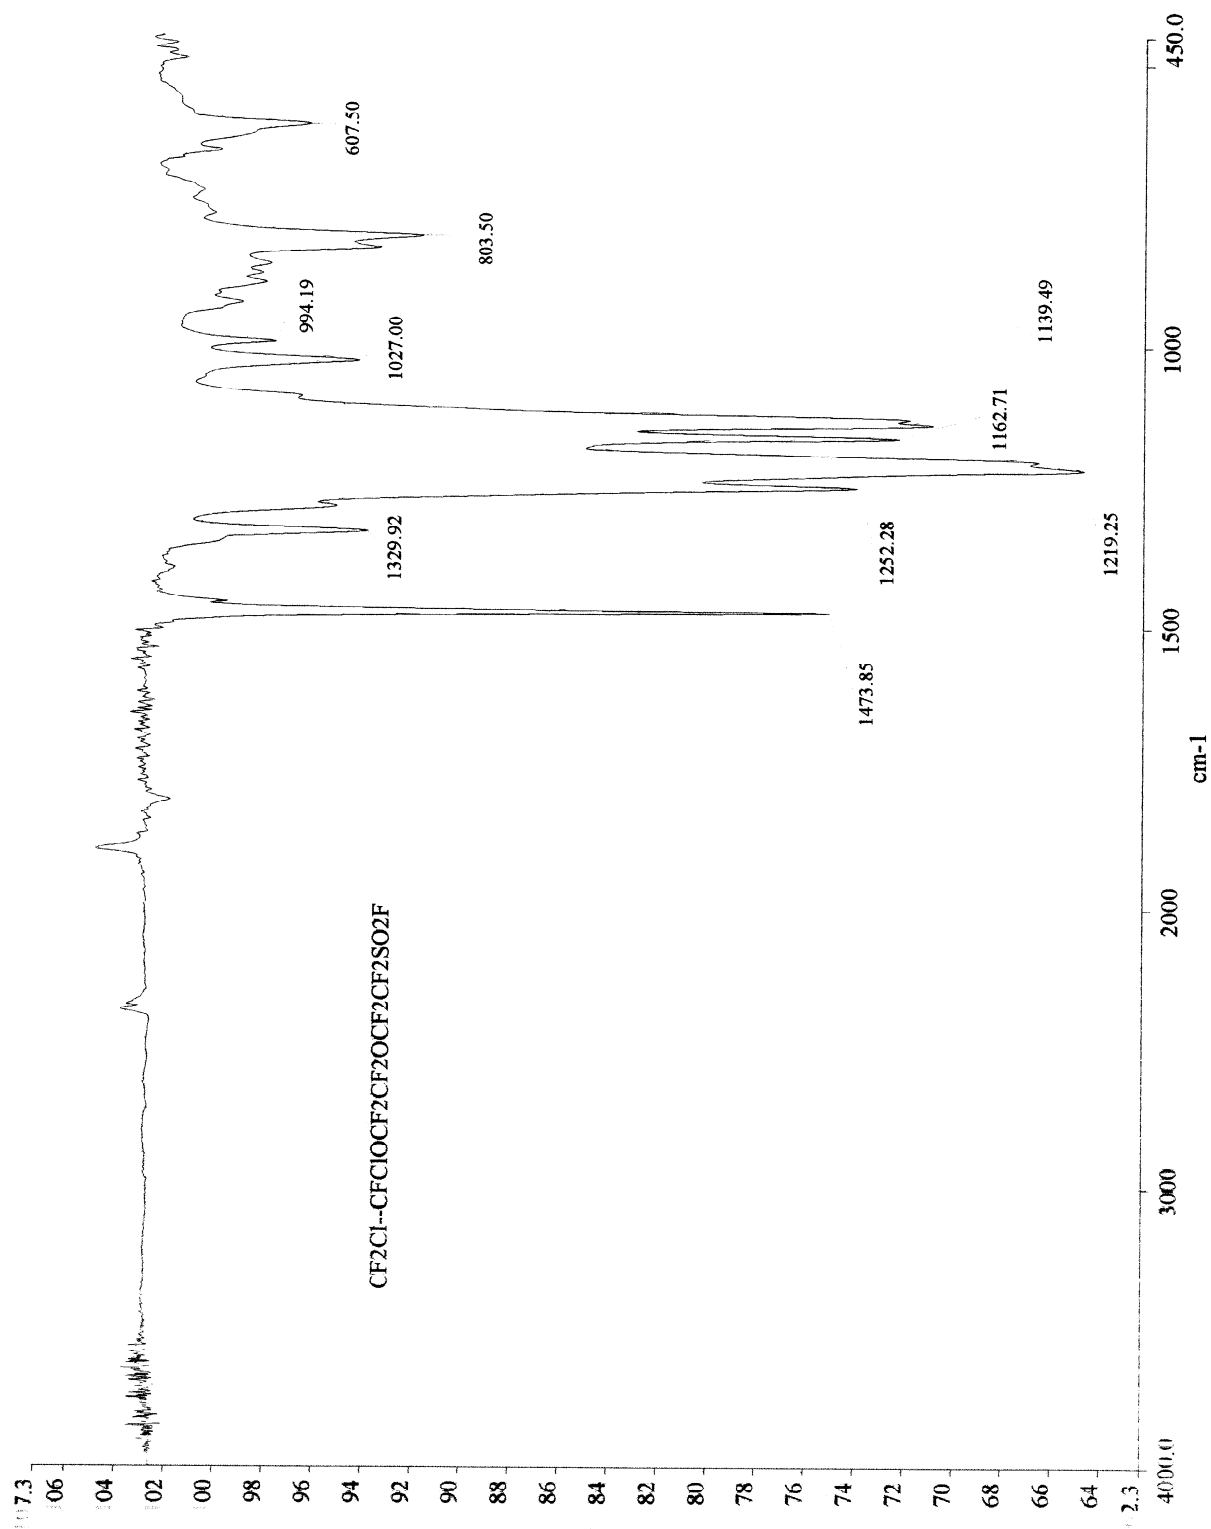

Figure S7. IR spectrum of **6**.



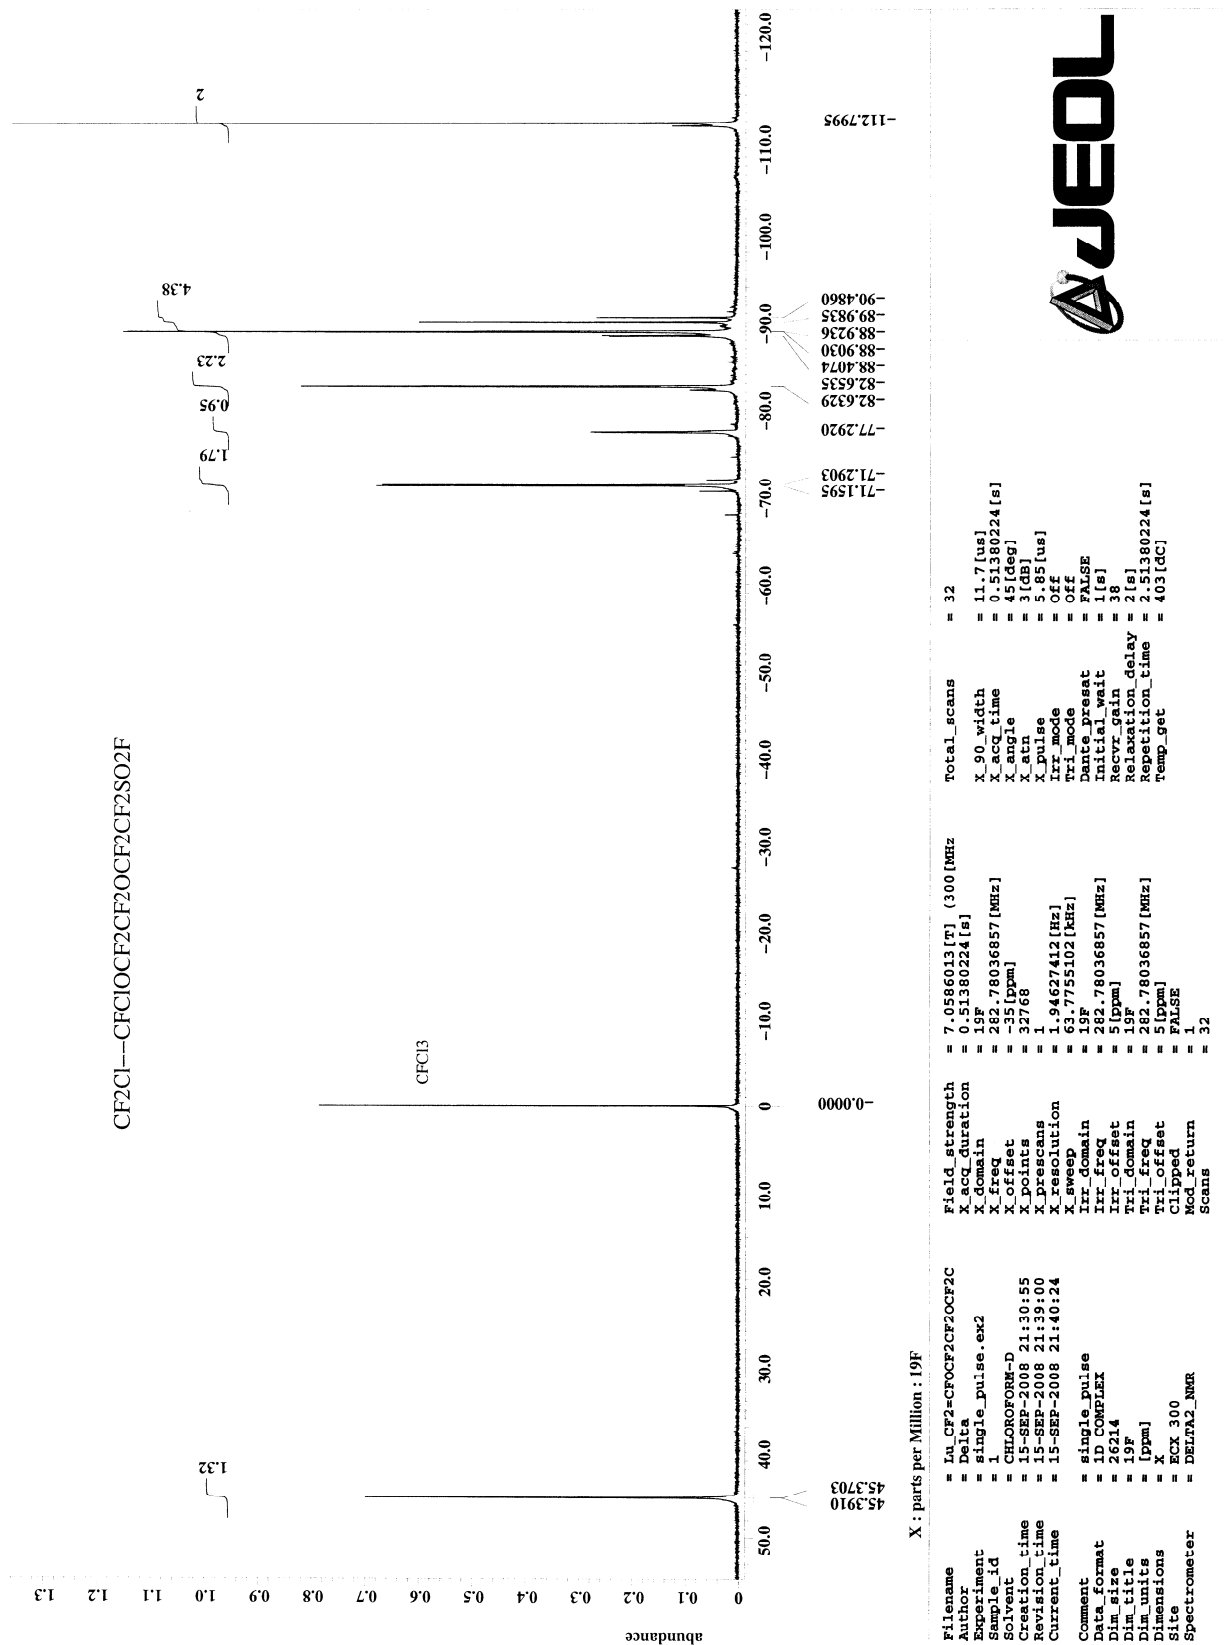

Figure S8. <sup>19</sup>F NMR spectrum of 6.

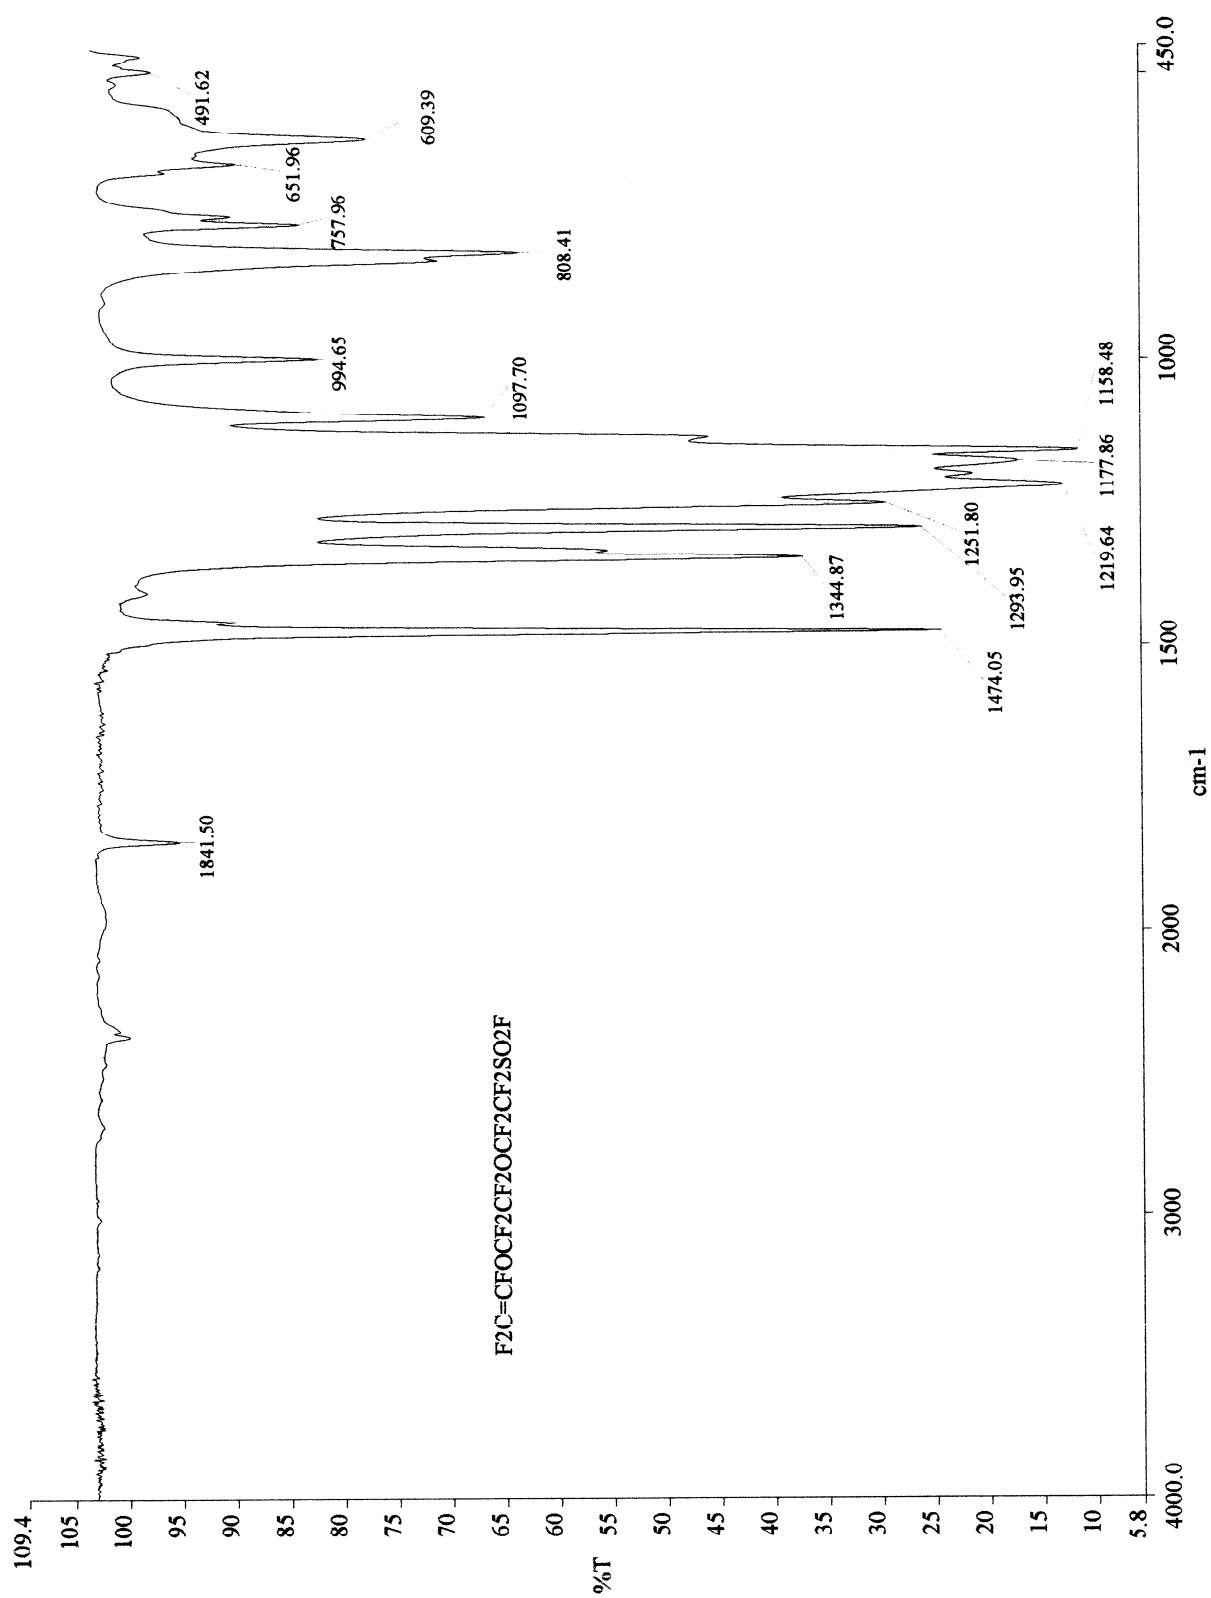

**Figure S9.** IR spectrum of **8** obtained via first synthetic route.

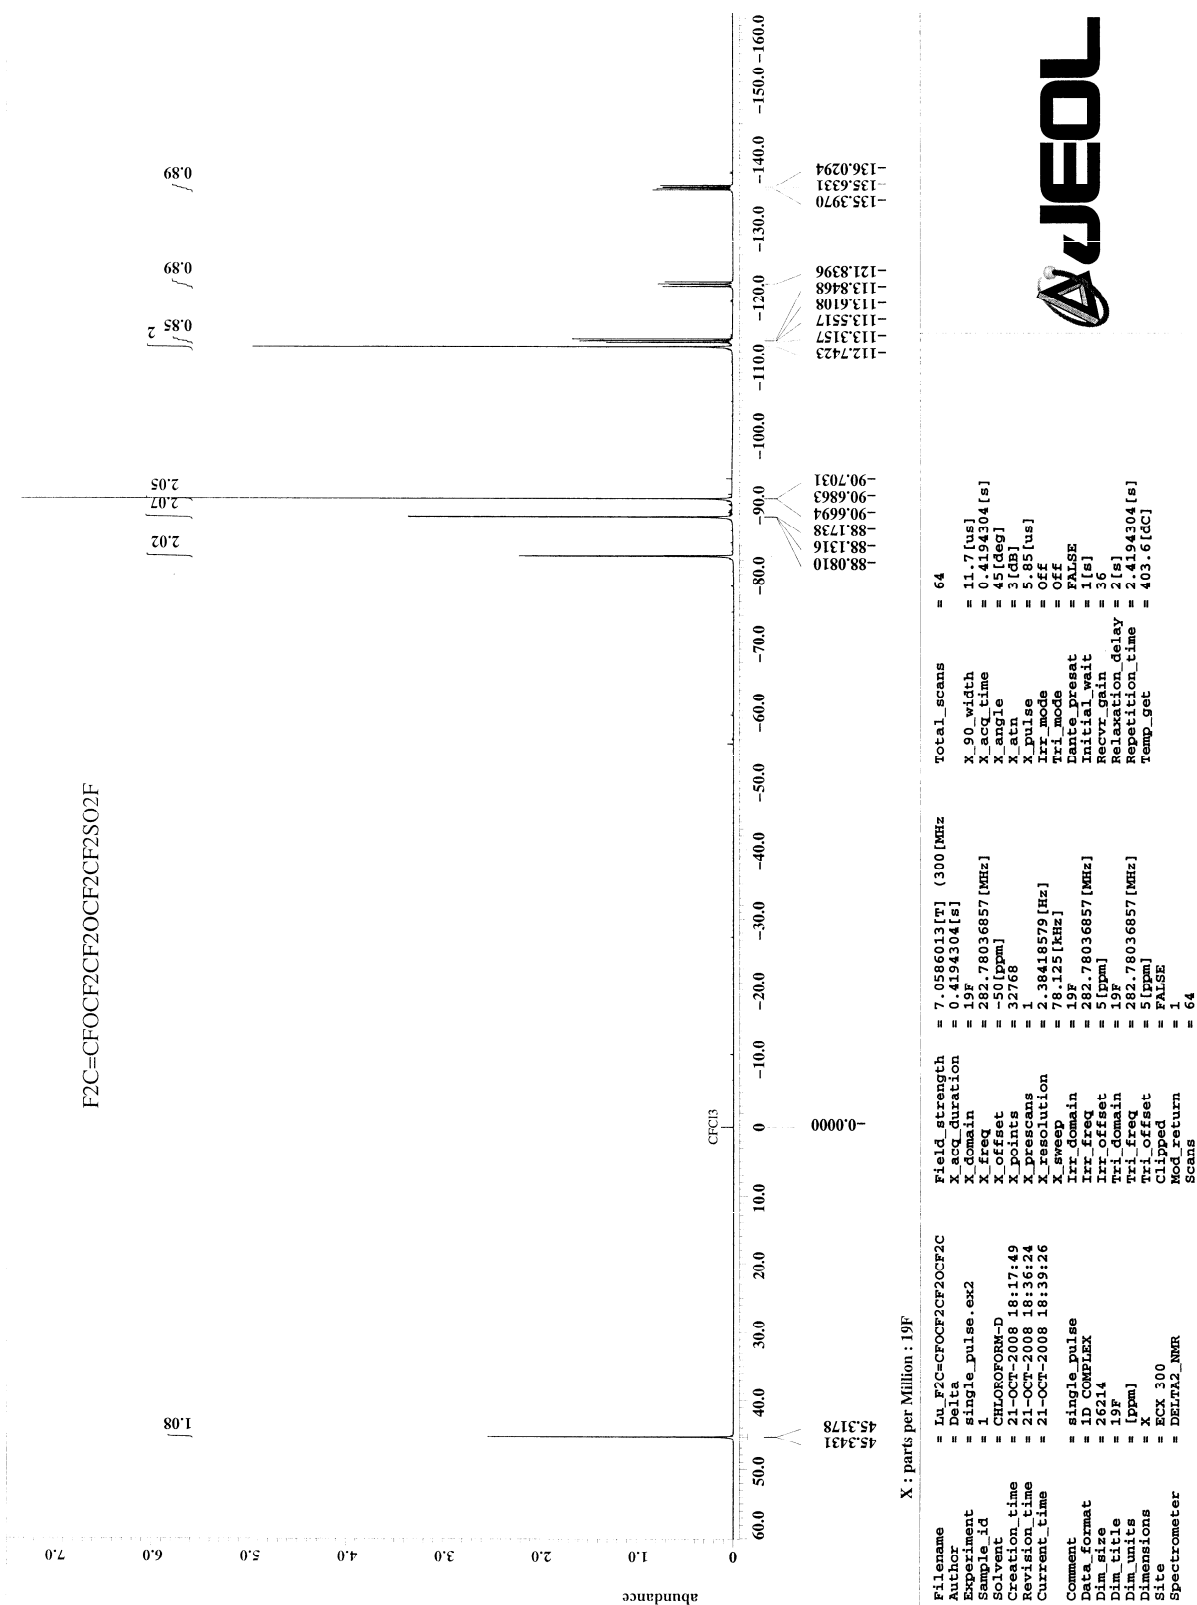

Figure S10.  $^{19}\text{F}$  NMR spectrum of **8** obtained via first synthetic route.

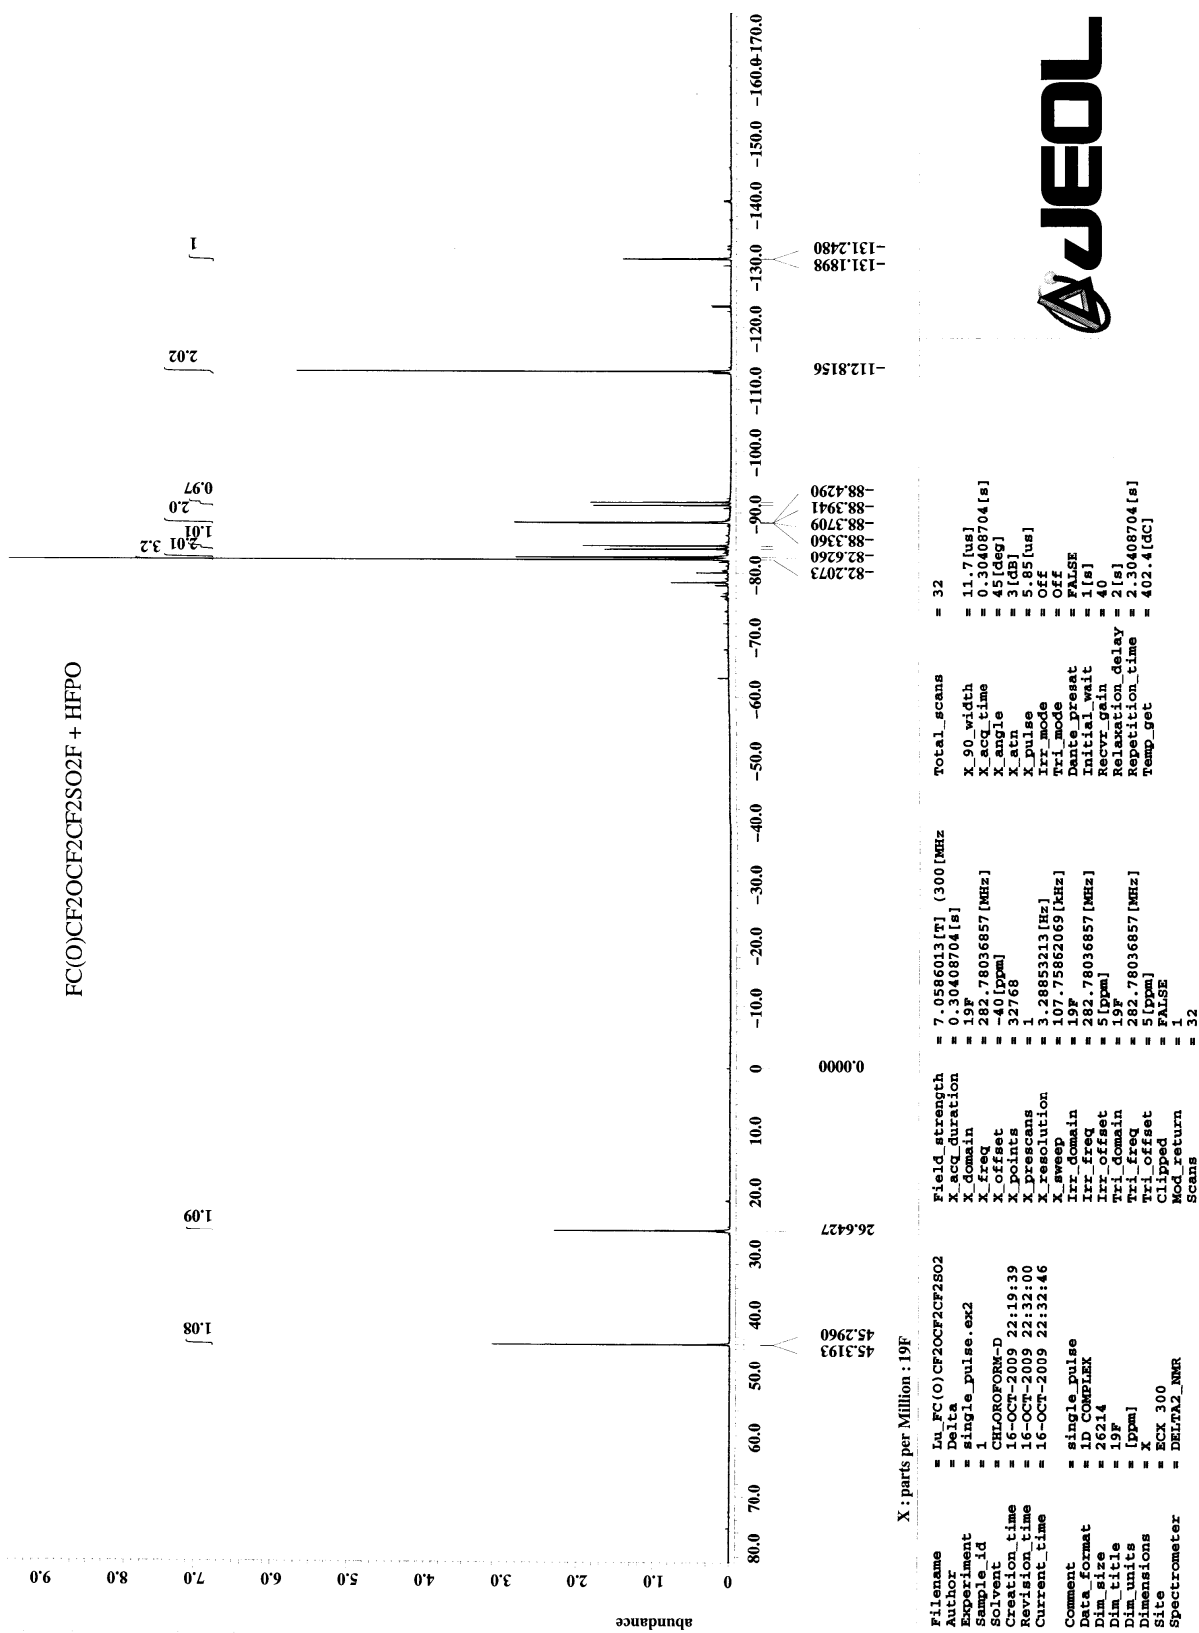

Figure S11. <sup>19</sup>F NMR spectrum of 7.

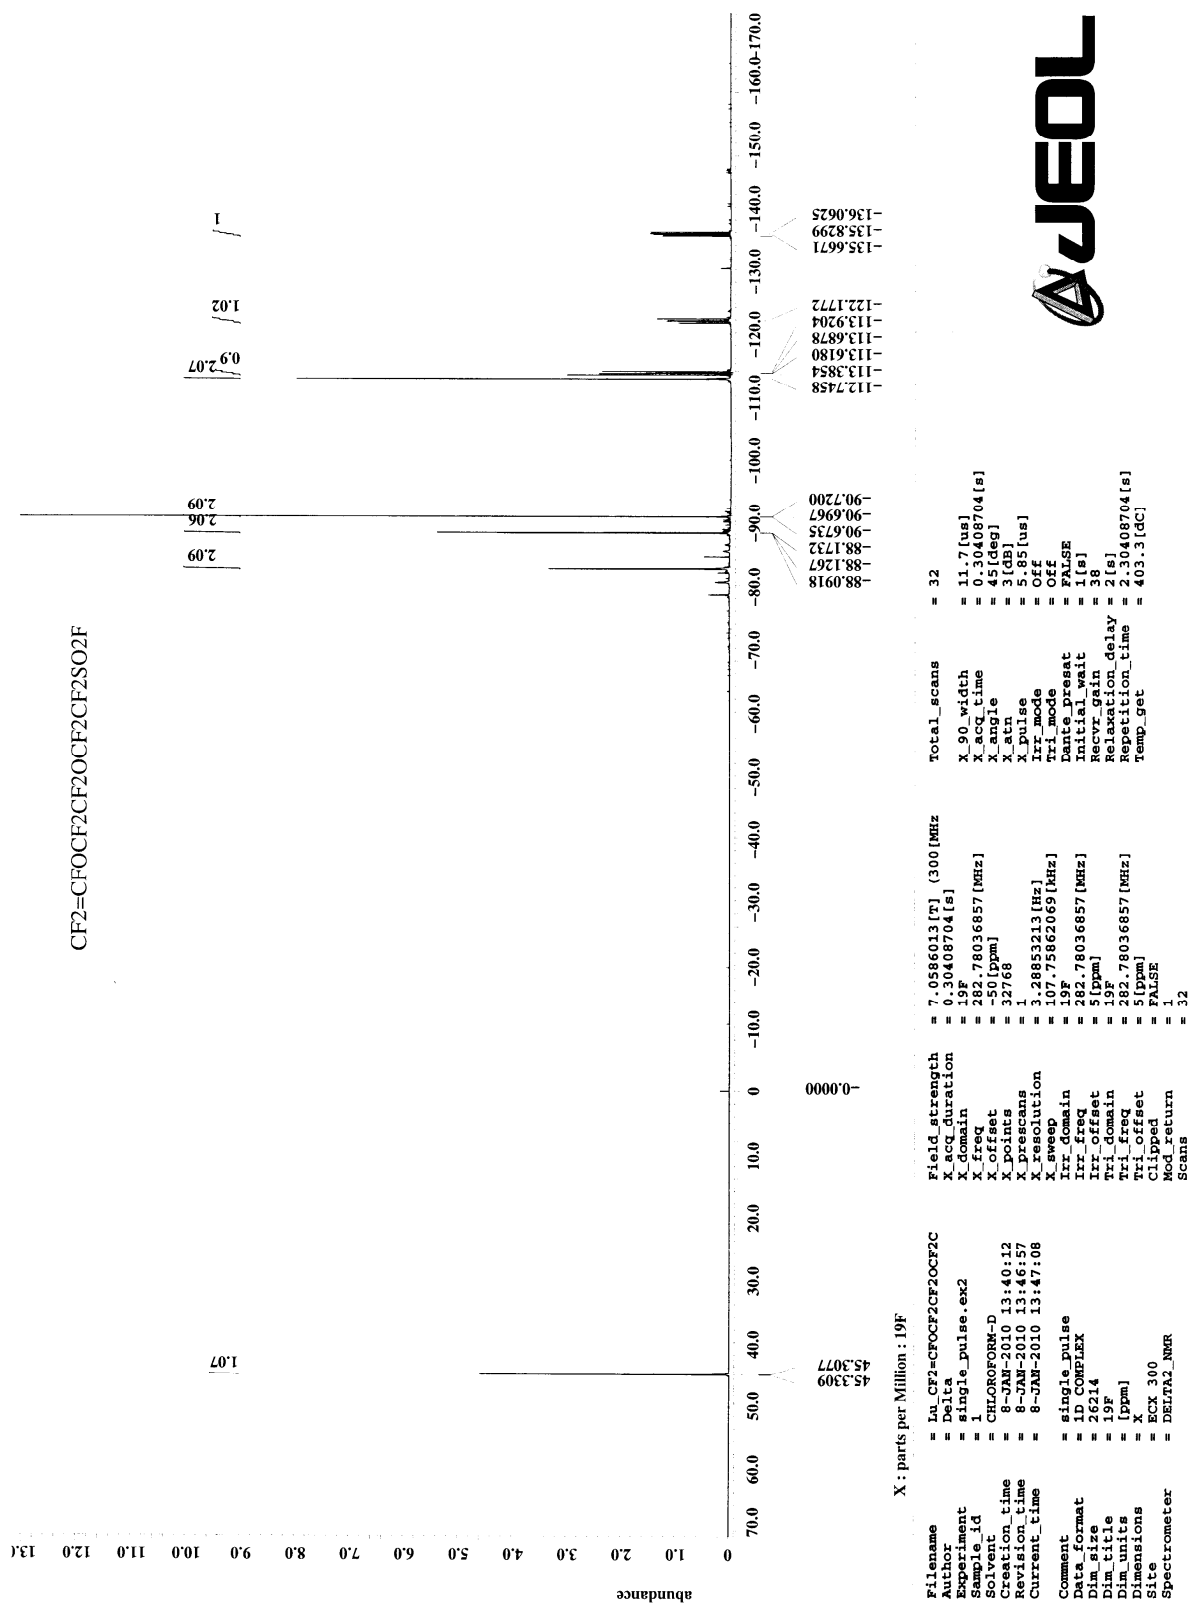

**Figure S12.** <sup>19</sup>F NMR spectrum of **8** obtained via second synthetic route.

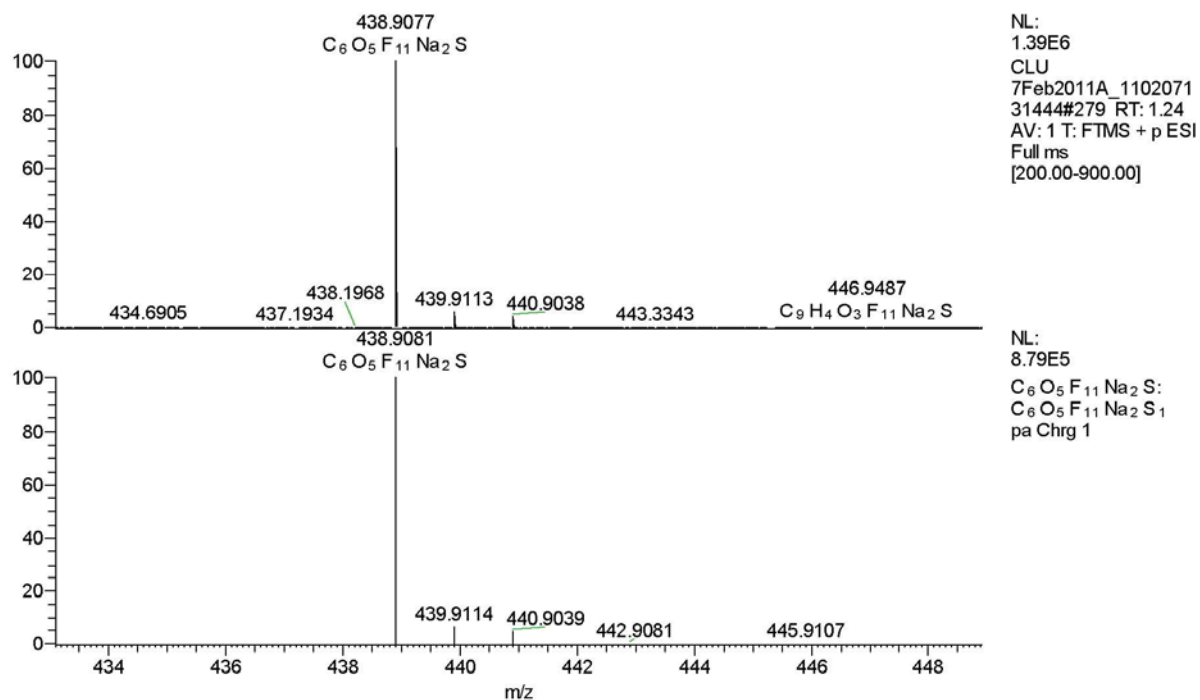

Within 1 ppm of  $C_6O_5F_{11}Na_2S$

Top is experimental spectrum

Bottom is calculated spectrum

**Figure S13.** HRMS analysis of hydrolyzed **8** obtained via second synthetic route,  $m/z[M-F+ONa+Na]^+ = 438.9077$ , calcd ( $C_6O_5F_{11}SNa_2$ ) 438.9081.
